# Supplementary material for: 3D printed personalized titanium plates improve clinical outcome in microwave ablation of bone tumors around the knee
Source: PubMed Central journal article supplement (PMC5548746; doi:10.1038/s41598-017-07243-3), 2017-08-08
Supplement: 41598_2017_7243_MOESM1_ESM.pdf [file 41598_2017_7243_MOESM1_ESM.pdf]

## Supplementary Materials

### **3D printed personalized titanium plates improve clinical outcome in microwave ablation of bone tumors around the knee**

Limin Ma<sup>†1</sup>, Ye Zhou<sup>†1</sup>, Ye Zhu,<sup>2</sup> Zefeng Lin<sup>1</sup>, Lingling Chen<sup>1</sup>, Yu Zhang<sup>\*1</sup>, Hong Xia<sup>\*1</sup>, Chuanbin Mao<sup>\*2,3</sup>

1. Department of Orthopedics, Guangdong Key Lab of Orthopedic Technology and Implant, Guangzhou General Hospital of Guangzhou Military Command, 111 Liuhua Road, Guangzhou 510010, China. E-mail: [luck\\_2001@126.com](mailto:luck_2001@126.com), [gzxiahong2@126.com](mailto:gzxiahong2@126.com)

2. Department of Chemistry and Biochemistry, Stephenson Life Sciences Research Center, University of Oklahoma, Norman OK 73019, USA. E-mail: [cbmao@ou.edu](mailto:cbmao@ou.edu)

3. School of Materials Science and Engineering, Zhejiang University, Hangzhou, Zhejiang, 310027, China.

<sup>†</sup> These authors contributed equally to this work.

**Patient one**

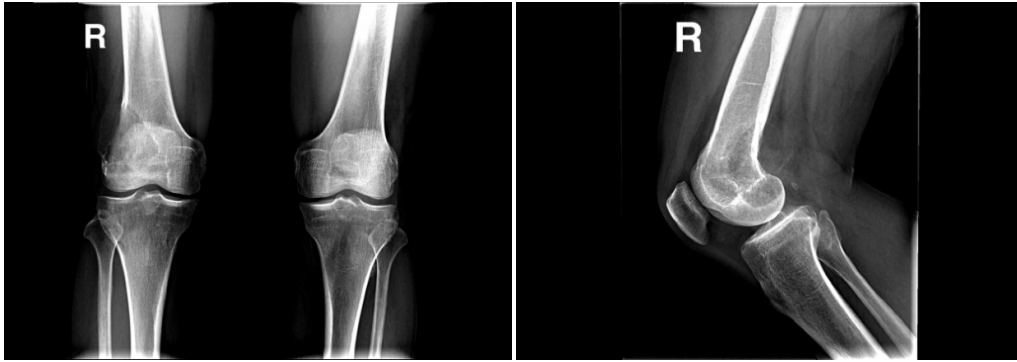

Preoperative radiographs (Left, front view; right, lateral view)

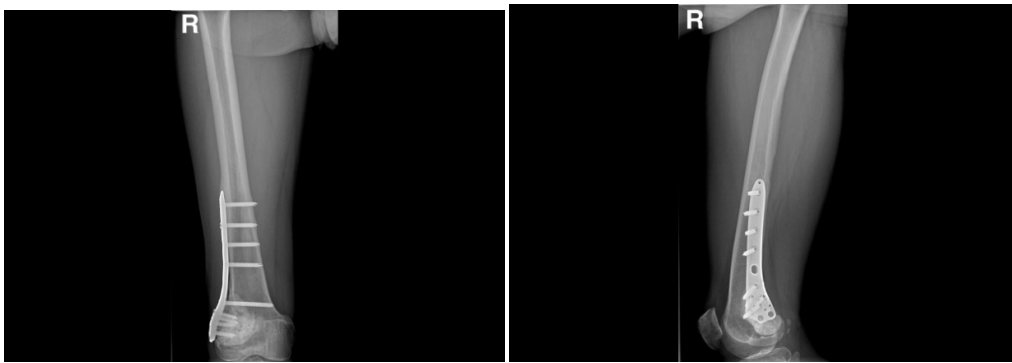

Postoperative radiographs (Left, front view; right, lateral view)

**Patient two**

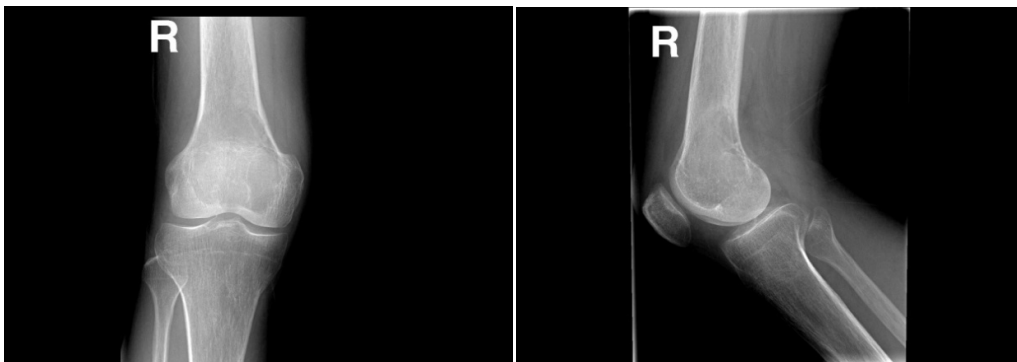

Preoperative radiographs (Left, front view; right, lateral view)

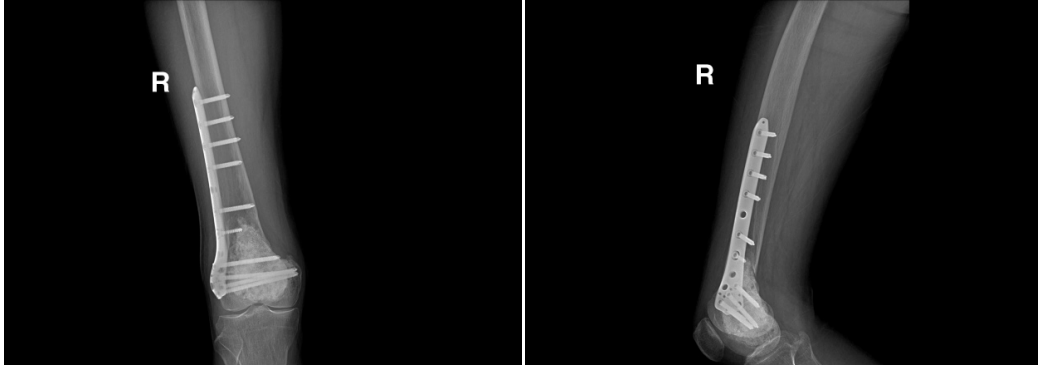

Postoperative radiographs (Left, front view; right, lateral view)

**Patient three**

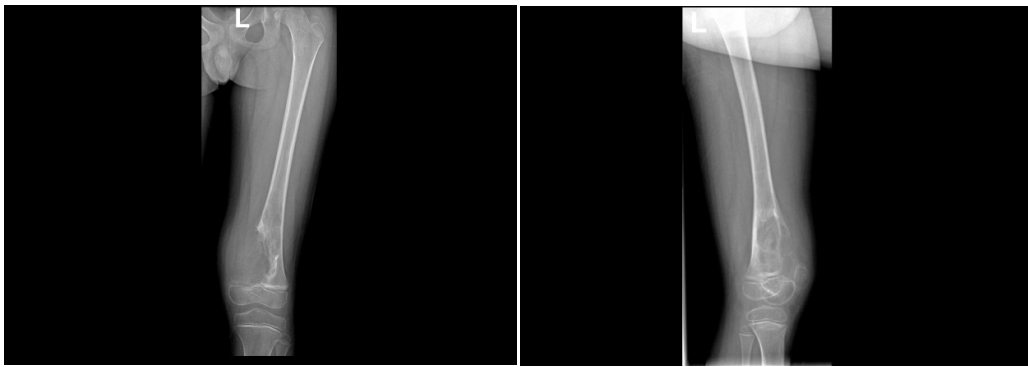

Preoperative radiographs (Left, front view; right, lateral view)

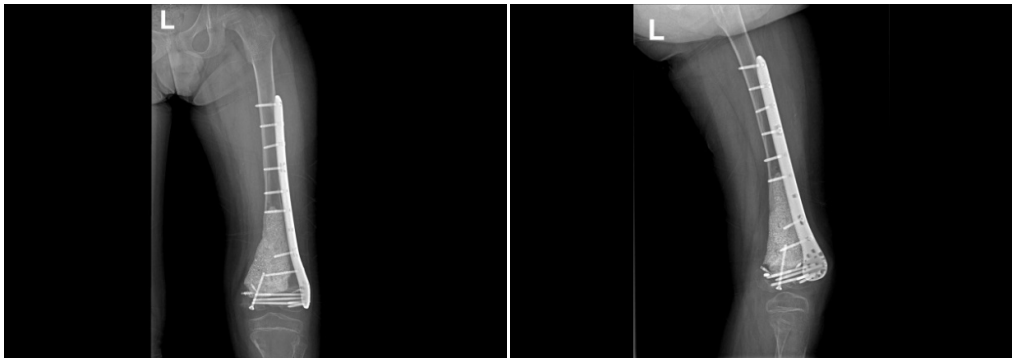

Postoperative radiographs (Left, front view; right, lateral view)

**Patient four**

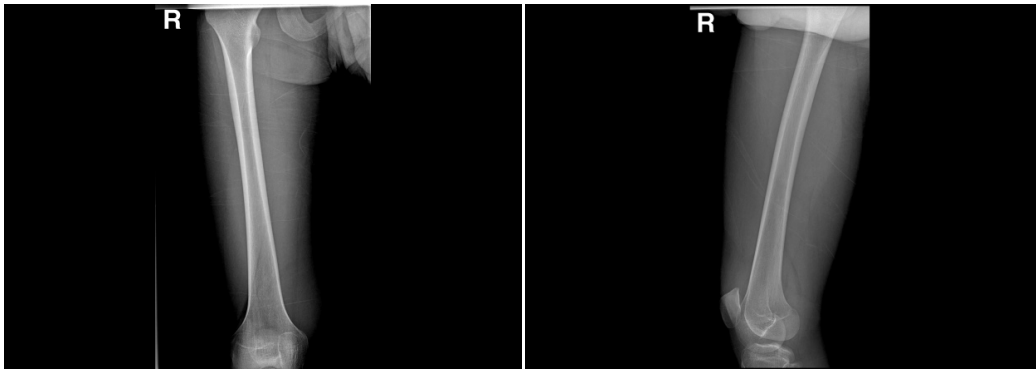

Preoperative radiographs (Left, front view; right, lateral view)

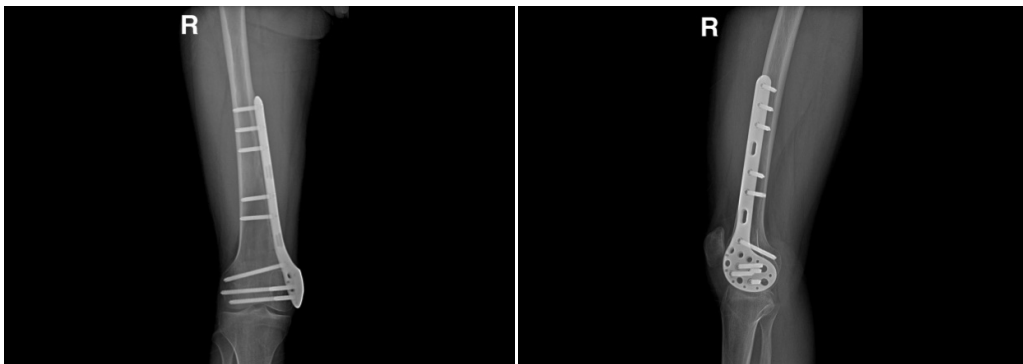

Postoperative radiographs (Left, front view; right, lateral view)

**Patient five**

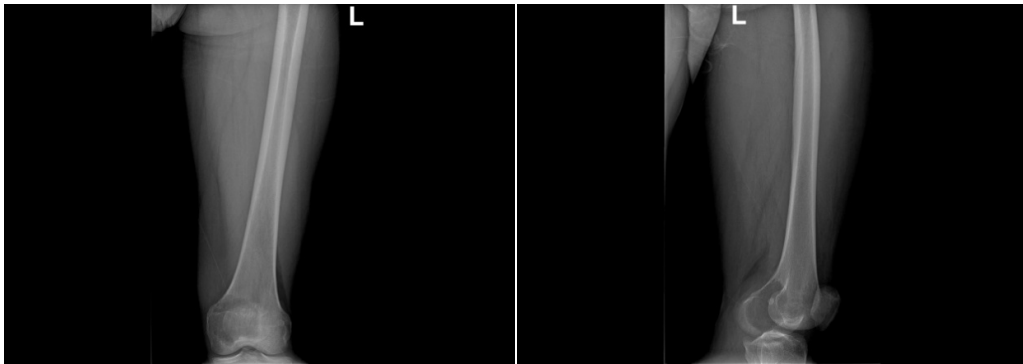

Preoperative radiographs (Left, front view; right, lateral view)

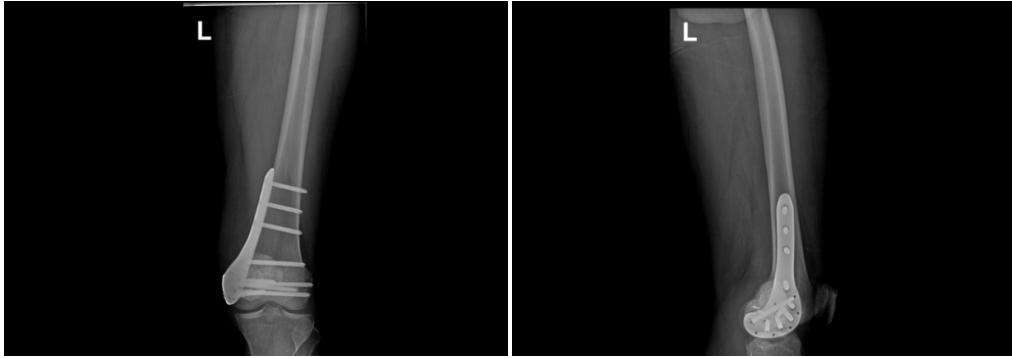

Postoperative radiographs (Left, front view; right, lateral view)

**Patient six**

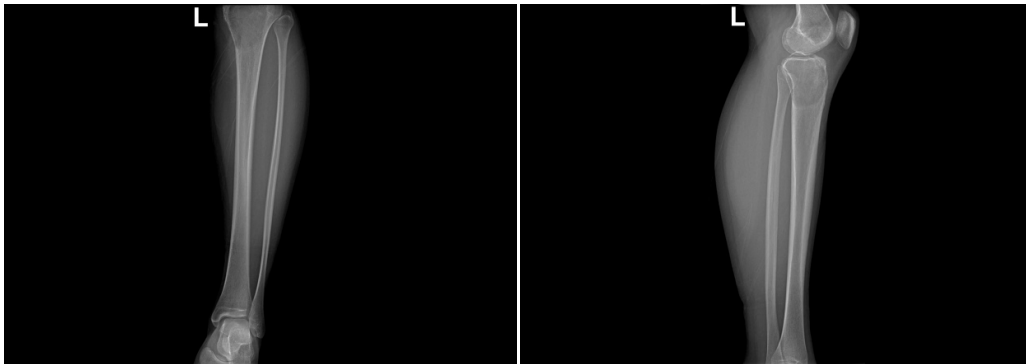

Preoperative radiographs (Left, front view; right, lateral view)

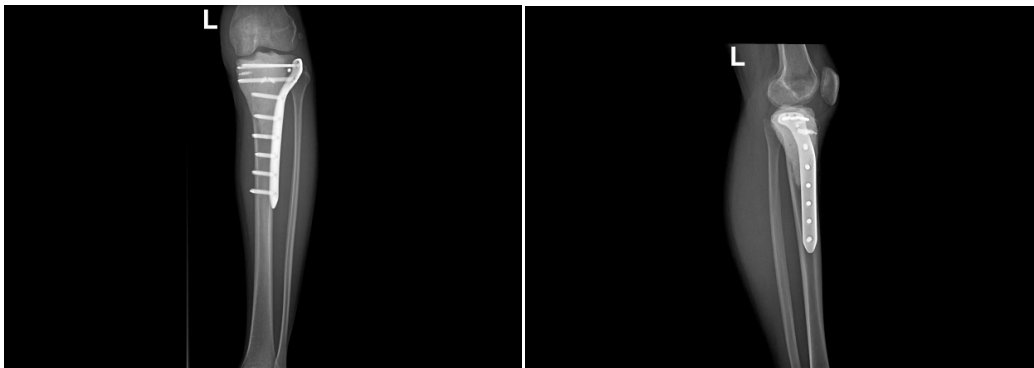

Postoperative radiographs (Left, front view; right, lateral view)

**Patient seven**

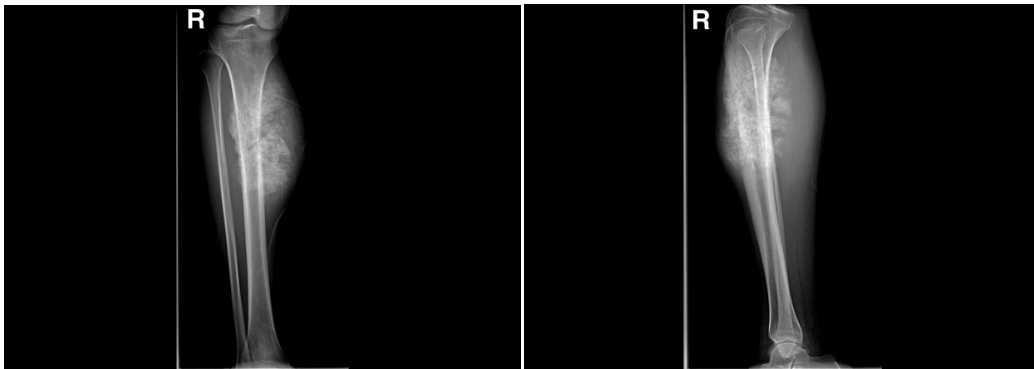

Preoperative radiographs (Left, front view; right, lateral view)

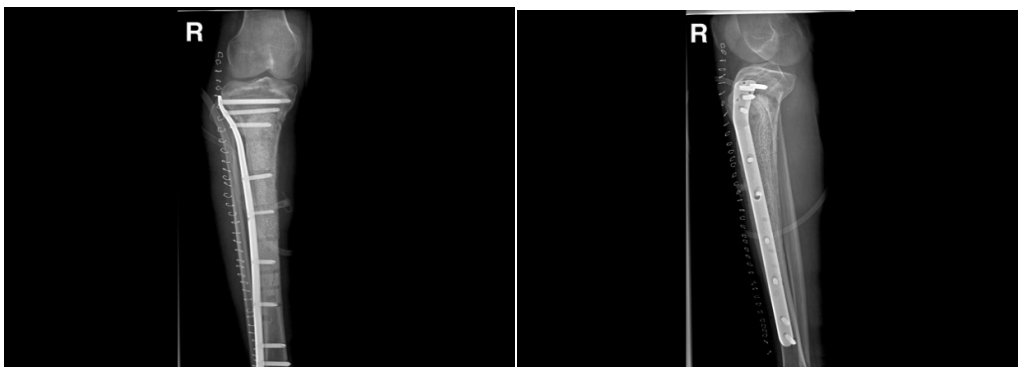

Postoperative radiographs (Left, front view; right, lateral view)

**Patient eight**

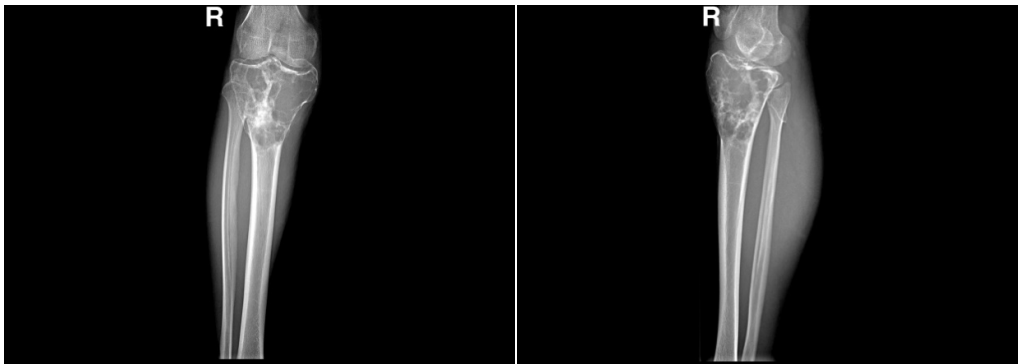

Preoperative radiographs (Left, front view; right, lateral view)

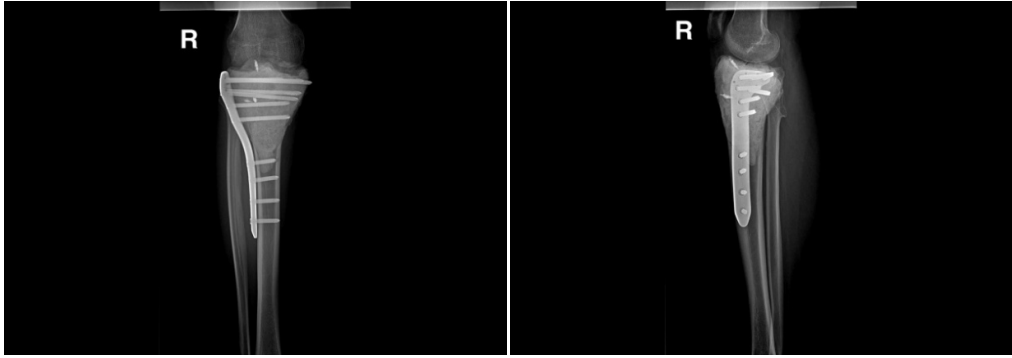

Postoperative radiographs (Left, front view; right, lateral view)

**Patient nine**

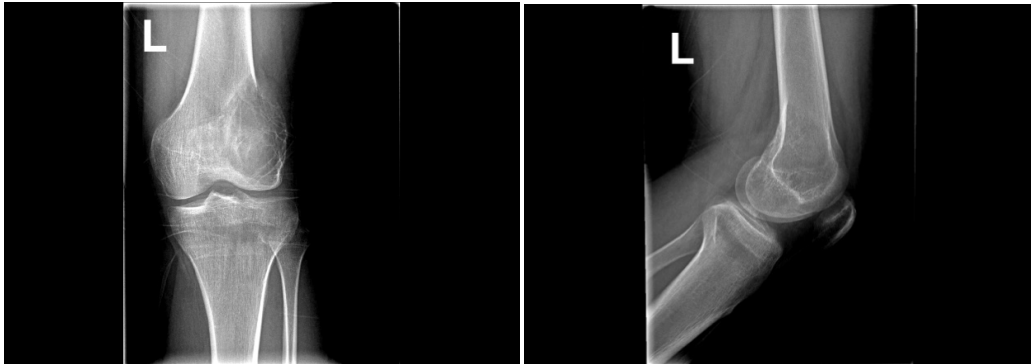

Preoperative radiographs (Left, front view; right, lateral view)

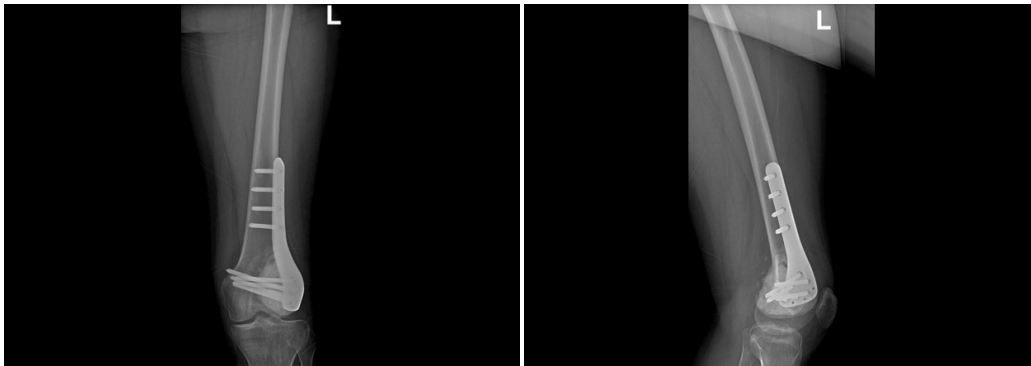

Postoperative radiographs (Left, front view; right, lateral view)

**Patient ten**

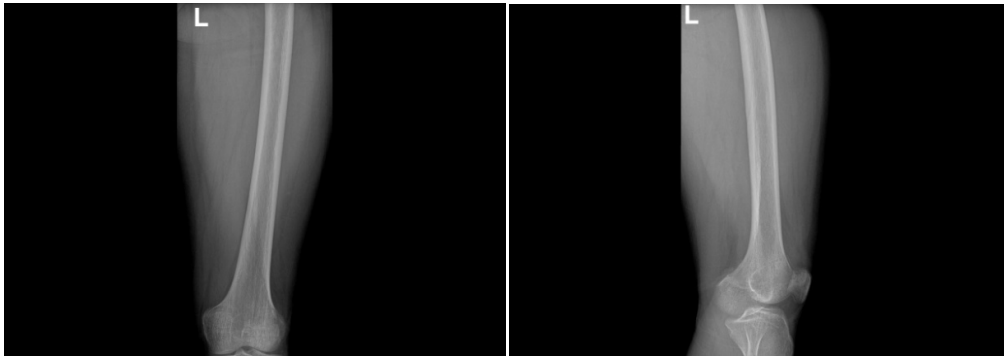

Preoperative radiographs (Left, front view; right, lateral view)

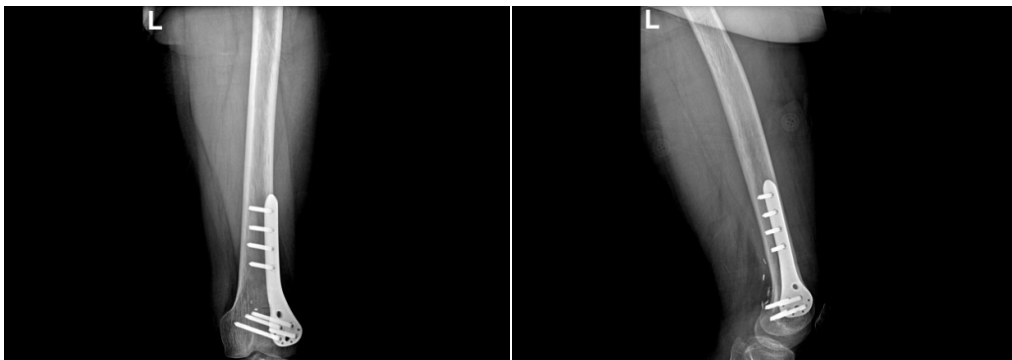

Postoperative radiographs (Left, front view; right, lateral view)

**Patient eleven**

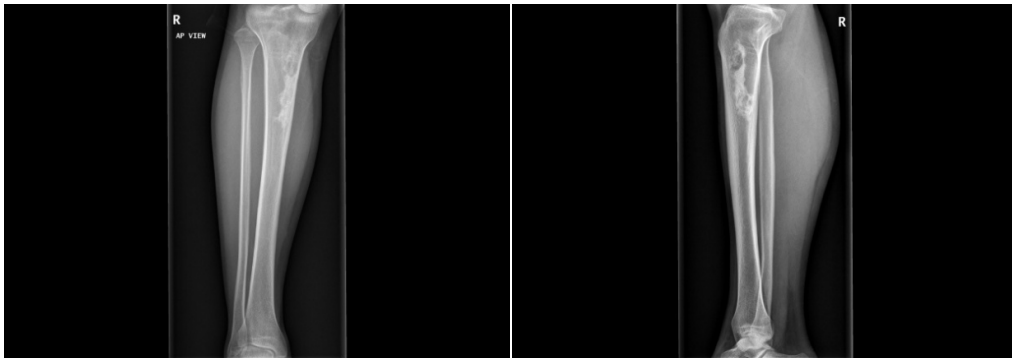

Preoperative radiographs (Left, front view; right, lateral view)



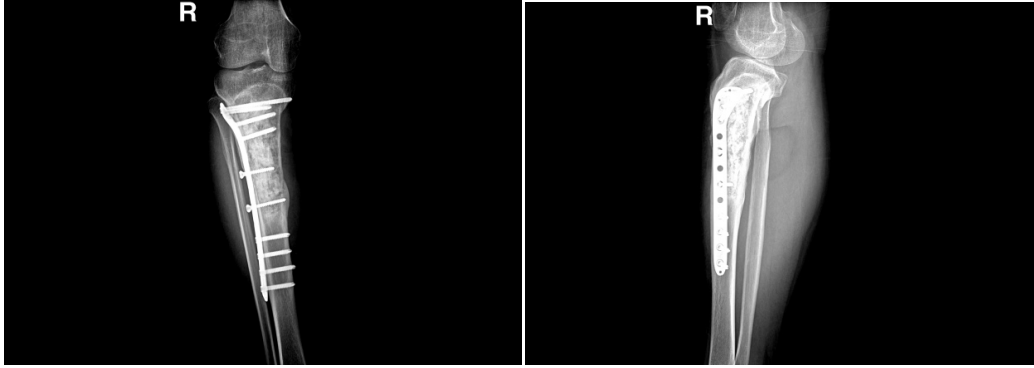

Postoperative radiographs (Left, front view; right, lateral view)

**Patient twelve**

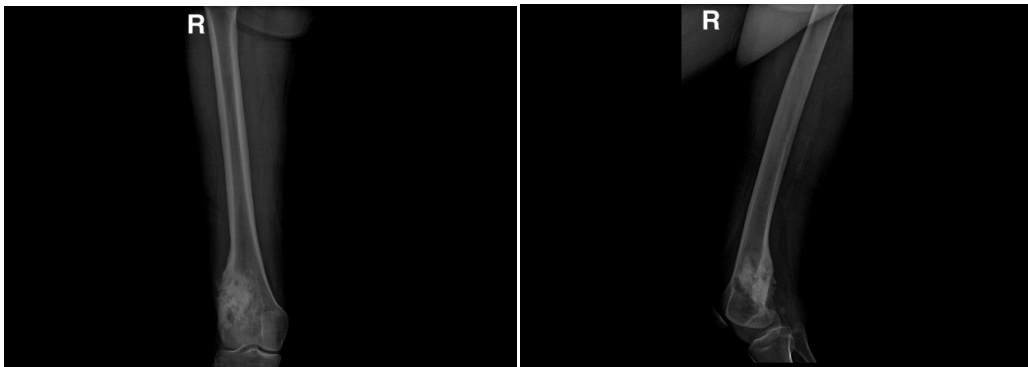

Preoperative radiographs (Left, front view; right, lateral view)

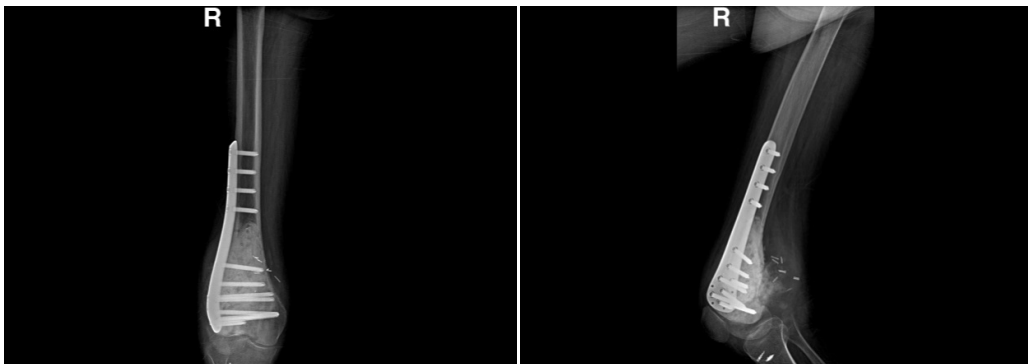

Postoperative radiographs (Left, front view; right, lateral view)
